# Supplementary material
Source: Springer Nature journal article supplement (https://www.springermedizin.de/resource/supplementary/12936_2007_524_MOESM2_ESM.pdf/9548188)
Supplement: MOESM2 [file 9548188]

**Table B: Collection of net samples.** Figures in italic represent retreatments or exchanges of nets without removal. PN1= Permanet 1<sup>st</sup> generation, PN2=Permanet 2<sup>nd</sup> generation, conv=conventionally treated.

| Months since start | Time of net collection | Study nets sampled or removed |                                   |              |
|--------------------|------------------------|-------------------------------|-----------------------------------|--------------|
|                    |                        | PN1<br>N=460                  | Conv<br>N=150                     | PN2<br>N=270 |
| 0 --               | Dec. 2000              | 10                            | 10                                |              |
| 6 --               | Jul. 2001              | 40                            | 40                                |              |
| 12 --              | Jan. 2002              | 40                            |                                   |              |
|                    | Mar. 2002              | <i>20 retreated</i>           | <i>20 retreated, 40 exchanged</i> |              |
| 20 --              | Sep. 2002              | 42 + 19 retr.                 | 18 retr. + 34 exchanged           |              |
| -- (0)             | Oct. 2002              | 144*                          | <i>39 retreated</i>               | 10           |
| -- (3)             | Jan. 2003              |                               | 13 retr.                          |              |
| 27 (6)             | Apr. 2003              | 40                            | 14 retr.                          | 40           |
| -- (12)            | Oct. 2003              |                               | 11 retr.                          | 40           |
| 39 (18)            | Apr. 2004              | 38                            |                                   | 40           |
| -- (24)            | Oct. 2004              |                               |                                   | 38           |
| -- (36)            | Oct. 2005              |                               |                                   | 40           |
|                    | Total removed          | 373                           | 140                               | 208          |
|                    | Seen last survey       | 71                            | 10                                | 35           |
|                    | Lost to follow-up      | 16                            | 0                                 | 27           |
